# Supplementary material
Source: publisher site journal article supplement (https://www.dovepress.com/article/345380)
Supplement: Supplementary file 1 [file get_supplementary_file.php]

Appendix 1 Factor Loading for Infectious Threat Perception Questionnaire Items and Mean Scores

| Item | Factor Loading | Maxi | Mini | Mean | SD |
| --- | --- | --- | --- | --- | --- |
| The pandemic spread further. | .895 | 49.00 | 1.00 | 20.912 | 13.366 |
| Someone in the neighborhood is or will be confirmed as having COVID-19 | .892 | 49.00 | 1.00 | 14.302 | 12.284 |
| You or your family members have symptoms including a fever or cough. | .889 | 49.00 | 1.00 | 12.012 | 10.831 |
| Someone refuses to isolate. | .853 | 49.00 | 1.00 | 14.416 | 13.090 |
| Your or your family members will be isolated by the authorities. | .835 | 49.00 | 1.00 | 10.390 | 11.820 |
| You or your family members will be infected. | .692 | 49.00 | 1.00 | 10.978 | 12.331 |
| Total |  | 342.00 | 14.00 | 110.802 | 66.196 |

Appendix 2 Factor Loading for COVID-19 Epidemic Information Transparency Questionnaire Items and Mean Scores

| Item | Factor Loading | Maxi | Mini | Mean | SD |
| --- | --- | --- | --- | --- | --- |
| The number of confirmed cases | .881 | 7.00 | 1.00 | 5.20 | 1.482 |
| The authenticity of the epidemic | .878 | 7.00 | 1.00 | 5.18 | 1.531 |
| The number of deaths | .874 | 7.00 | 1.00 | 5.21 | 1.507 |
| The allocation of medical resources | .803 | 7.00 | 1.00 | 5.61 | 1.333 |
| The severity of infection | .800 | 7.00 | 1.00 | 5.26 | 1.425 |
| The number of cured cases | .791 | 7.00 | 1.00 | 5.20 | 1.521 |
| Food and daily supplies | .773 | 7.00 | 1.00 | 5.08 | 1.536 |
| Total |  | 49.00 | 7.00 | 36.738 | 8.580 |

Appendix 3 Factor Loading for COVID-19 Prevention Behaviors Questionnaire Items and Mean Scores

| Item | Factor1 | Factor2 | Factor3 | Factor4 | Maxi | Mini | Mean | SD |
| --- | --- | --- | --- | --- | --- | --- | --- | --- |
| Stay at home | .865 |  |  |  | 7.00 | 1.00 | 4.85 | 2.207 |
| Wear a face mask | .788 |  |  |  | 7.00 | 1.00 | 5.30 | 2.010 |
| Avoid certain areas | .766 |  |  |  | 7.00 | 1.00 | 4.18 | 2.362 |
| Go to hospital |  | .839 |  |  | 7.00 | 1.00 | 2.45 | 1.823 |
| Take medicines or health products |  | .832 |  |  | 7.00 | 1.00 | 2.76 | 1.952 |
| Take temperature |  | .564 |  |  | 7.00 | 1.00 | 3.71 | 2.118 |
| Store masks or medicines |  | .519 |  |  | 7.00 | 1.00 | 3.64 | 2.083 |
| Wash hands |  |  | .802 |  | 7.00 | 1.00 | 5.44 | 1.687 |
| Do exercise |  |  | .787 |  | 7.00 | 1.00 | 4.92 | 1.872 |
| Disinfect room |  |  | .516 |  | 7.00 | 1.00 | 3.92 | 1.963 |
| Collect information about the pandemic |  |  |  | .839 | 7.00 | 1.00 | 5.01 | 1.783 |
| Collect and forward protection methods |  |  |  | .802 | 7.00 | 1.00 | 4.80 | 1.781 |
| Pay attention to health and take precautions around other people |  |  |  | .739 | 7.00 | 1.00 | 5.19 | 1.551 |
| Share COVID-19 knowledge with family members |  |  |  | .720 | 7.00 | 1.00 | 5.57 | 1.449 |
| Urge family members to follow public health advice |  |  |  | .670 | 7.00 | 1.00 | 5.72 | 1.399 |
| Forward information about the pandemic |  |  |  | .644 | 7.00 | 1.00 | 3.30 | 1.984 |
| Total |  |  |  |  | 112.00 | 16.00 | 70.792 | 18.494 |
